# Supplementary material
Source: Springer Nature journal article supplement (https://www.springermedizin.de/resource/supplementary/12882_2013_922_MOESM1_ESM.pdf/9454010)
Supplement: MOESM1 [file 9454010]

### **eligibility criteria**

- chronic hemodialysis patients for at least 3 months at Aachen University Hospital and associated outpatient dialysis centers,
- $\geq 18$  years,
- patients capable and willing to give written and informed consent,

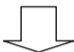

### **exclusion criteria**

- less than three haemodialysis sessions per week,
- anticipated living kidney donation,
- permanent or current atrial fibrillation,
- body weight exceeding 130 kg,
- immobility
- severe comorbidities requiring medical assistance during transport and CT scanning<sup>§</sup>,
- history of coronary bypass surgery, coronary stent implantation or aortic valve surgery<sup>§§</sup>

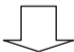

<sup>§</sup> decision was based on medical history and interview with the treating nephrologist

<sup>§§</sup> evaluated by obtaining medical history and chart review by study team

### **participants**

n = 67 for AVC assessment

n = 65 for CAC assessment <sup>§§§</sup>

<sup>§§§</sup> In two patients the presence of coronary stents was not documented prior to CT scanning and these patients were excluded from CAC analyses.
